# Supplementary material for: Slow magnetic relaxation and luminescence properties in β-diketonate lanthanide(iii) complexes. Preparation of Eu(iii) and Yb(iii) OLED devices
Source: Royal Society of Chemistry journal article supplement (doi:10.1039/d4tc00902a), 2024-01-01
Supplement: d4tc00902a1.pdf [file d4tc00902a1.pdf]

# Slow magnetic relaxation and luminescence properties in $\beta$ -diketonate lanthanide(III) complexes. Preparation of Eu(III) and Yb(III) OLED devices.

Ànnia Tubau, Laura Rodríguez, Piotr Pander, Lucy Weatherill, Fernando B. Dias, Mercè Font-Bardía, Ramon Vicente.

## Elemental analysis and Infrared Spectroscopy.

Compilation of the bands seen in the infrared spectra of compounds **1-Sm** to **6-Yb**.

[Sm(Btfa)<sub>3</sub>(4,4'-dinonyl-2,2'-bipy)] (**1-Sm**): Anal. Calc. For C<sub>58</sub>H<sub>62</sub>SmF<sub>9</sub>N<sub>2</sub>O<sub>6</sub> (1108.4 g/mol): C, 62.8; N, 2.5; H, 5.6 %. Found: C, 62.4; N, 2.5; H, 5.6 %. Selected IR bands (ATR-IR, cm<sup>-1</sup>): 2928.6(m), 2858.5(m), 1608.5(s), 1573.4(m, split), 1522.4(m, split), 1318.3(m), 1292.8(s), 1241.8(m), 1184.4(s), 1133.4(s), 1076.0(m), 1015.4(m), 945.3(m), 763.5(s), 702.9(s), 632(m), 578.57(m). (Fig. S2)

[Eu(Btfa)<sub>3</sub>(4,4'-dinonyl-2,2'-bipy)] (**2-Eu**): Anal. Calc. For C<sub>58</sub>H<sub>62</sub>EuF<sub>9</sub>N<sub>2</sub>O<sub>6</sub> (1110.0 g/mol): C, 62.8; N, 2.5; H, 5.6 %. Found: C, 62.1; N, 2.4; H, 5.8 %. Selected IR bands (ATR-IR, cm<sup>-1</sup>): 2924.0(m), 2847.6(m), 1612.2.5(s), 1569.0(m, split), 1525.8(m, split), 1472.7(m), 1293.4(s), 1246.9(l), 1183.8(s), 1133.4(s), 1120.7(s), 1015.4(m), 1070.9(l), 781.9(s), 679.0(s), 562.7(m).

[Tb(Btfa)<sub>3</sub>(4,4'-dinonyl-2,2'-bipy)] (**3-Tb**): Anal. Calc. For C<sub>58</sub>H<sub>62</sub>TbF<sub>9</sub>N<sub>2</sub>O<sub>6</sub> (1117.0g/mol): C, 62.4; N, 2.5; H, 5.6 %. Found: C, 62.2; N, 2.4; H, 5.6 %. Selected IR bands (ATR-IR, cm<sup>-1</sup>): 2924.0(m), 2854.2(m), 1605.5(s), 1572.3(m), 1519.2(m), 1476.0(m), 1286.7(s), 1183.8(s), 1124.0(s), 1074.2(m), 1076.0(m), 762.0(m), 945.3(m), 692.3(m), 702.9(s), 625.8(m), 576.0(m).

[Dy(Btfa)<sub>3</sub>(4,4'-dinonyl-2,2'-bipy)] (**4-Dy**): Anal. Calc. For C<sub>58</sub>H<sub>62</sub>DyF<sub>9</sub>N<sub>2</sub>O<sub>6</sub> (1120.6 g/mol): C, 62.2; N, 2.5; H, 5.6 %. Found: C, 62.2; N, 2.3; H, 5.5 %. Selected IR bands (ATR-IR, cm<sup>-1</sup>): 2924.0(m), 2850.9(m), 1608.9(s), 1572.3(m), 1522.5(m, split), 1483.0(m, split), 1293.4(s), 1236.9(m), 1183.7(s), 1133.9(s), 1067.5(m), 1014.4(m), 945.3(m), 938.0(m), 758.7(s), 695.6(m), 629.2(m), 576.0(m).

[Er(Btfa)<sub>3</sub>(4,4'-dinonyl-2,2'-bipy)] (**5-Er**): Anal. Calc. For C<sub>58</sub>H<sub>62</sub>ErF<sub>9</sub>N<sub>2</sub>O<sub>6</sub> (1125.3 g/mol): C, 61.9; N, 2.5; H, 5.6 %. Found: C, 61.8; N, 2.7; H, 5.6 %. Selected IR bands (ATR-IR, cm<sup>-1</sup>): 2920.6(m), 2854.2(m), 1605.5(s), 1572.3(m), 1522.5(m, split), 1479.3(m, split), 1290.0(s), 1240.2(m), 1183.8(s), 1127.3(s), 1067.5(m), 1007.7(l), 762.0(m), 695.6(m), 625.8(m), 695.6(m), 576.0(m).

[Yb(Btfa)<sub>3</sub>(4,4'-dinonyl-2,2'-bipy)] (**6-Yb**): Anal. Calc. For C<sub>58</sub>H<sub>62</sub>YbF<sub>9</sub>N<sub>2</sub>O<sub>6</sub> (1131.1 g/mol): C, 61.6; N, 2.5; H, 5.5 %. Found: C, 61.7; N, 2.7; H, 5.3 %. Selected IR bands (ATR-IR, cm<sup>-1</sup>): 2927.3(m), 2850.9(m), 1605.5(s), 1569.0(m), 1519.2(m, split), 1486.0(m, split), 1290.0(s), 1240.2(m), 1177.1(s), 1127.3(s), 1070.9(m), 1011.1(l), 944.7(l), 758.7(s), 695.6(s), 625.8(m), 576.0(m).

[Gd(Btfa)<sub>3</sub>(4,4'-dinonyl-2,2'-bipy)] (**7-Gd**): Selected IR bands (ATR-IR, cm<sup>-1</sup>): 2927.3(m), 2850.9(m), 1605.5(s), 1575.6(m), 1522.5(m, split), 1479.3(m, split), 1286.7(s), 1236.9(m), 1177.1(s), 1184.7(s), 1130.6(s), 1074.2(l), 1011.0(l), 941.3(s), 758.6(s), 698.9(s), 625.8(m), 579.3(m), 509.6(l), 463.1(l).

## 1.1 Structure determination:

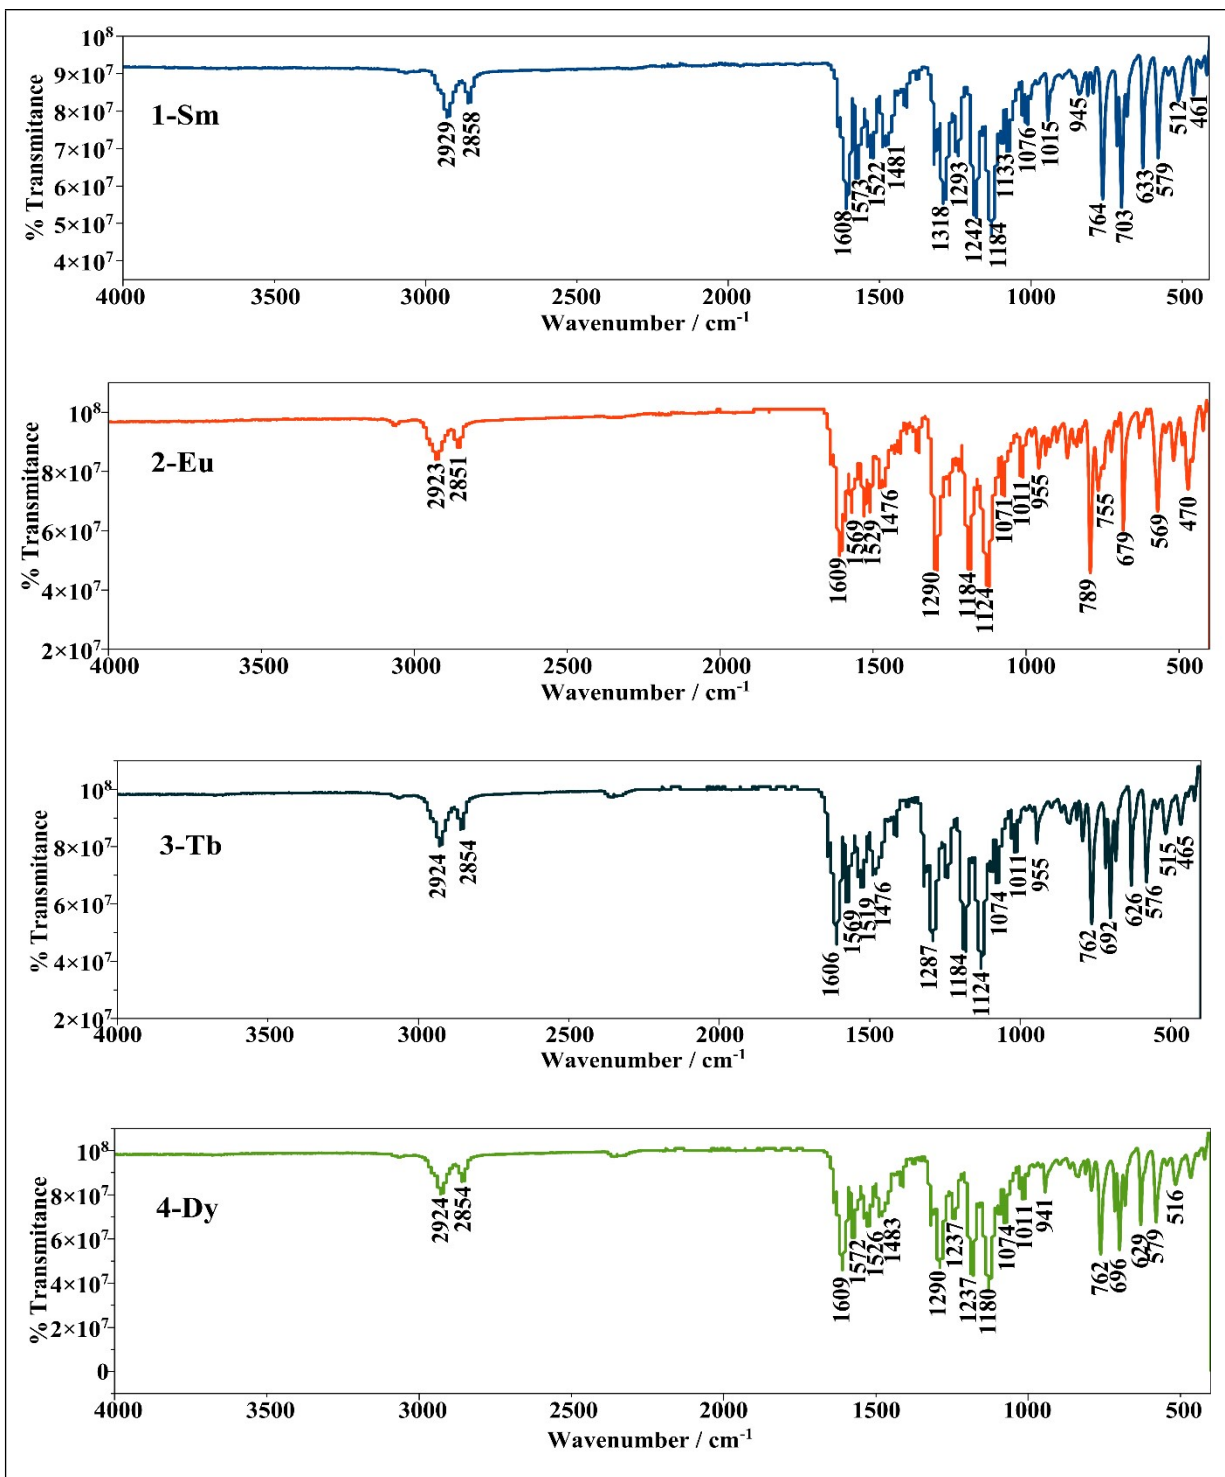

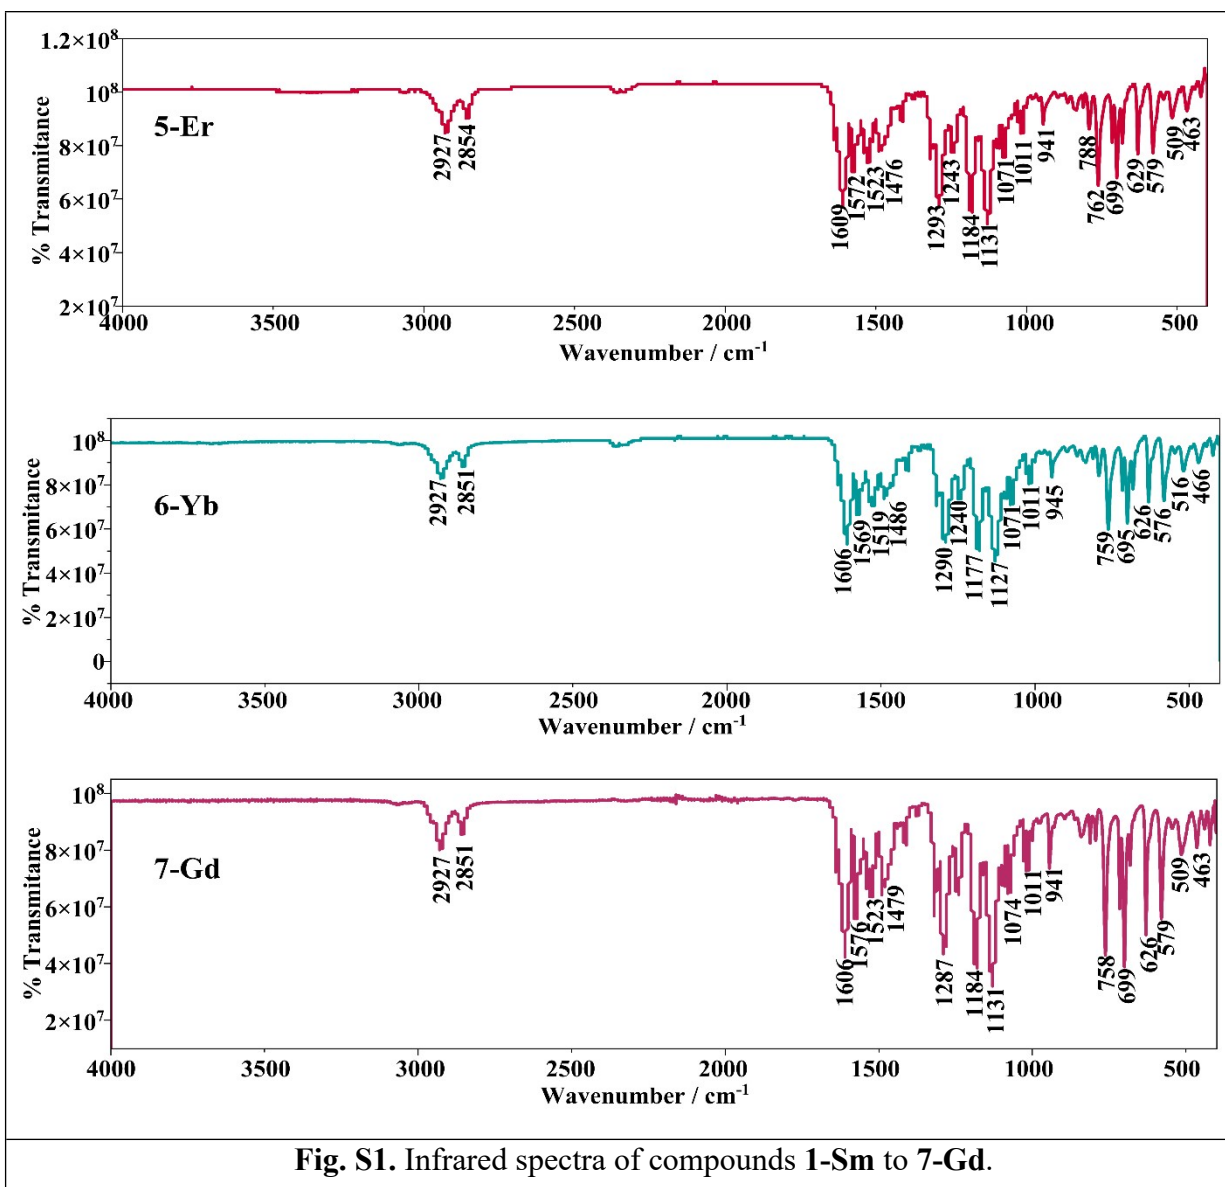

**Fig. S1.** Infrared spectra of compounds 1-Sm to 7-Gd.

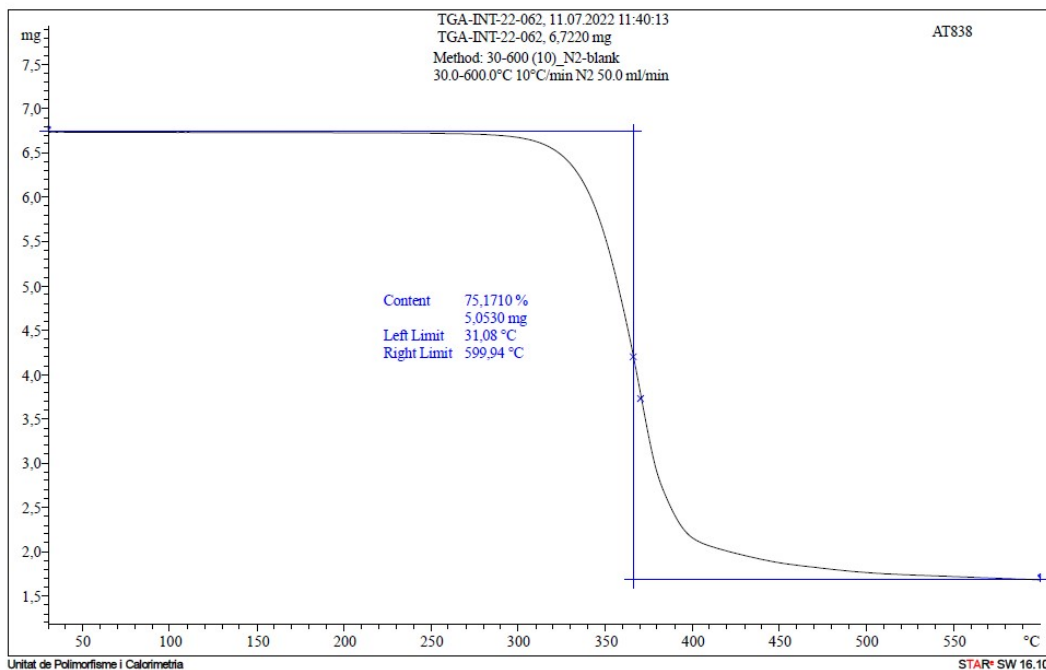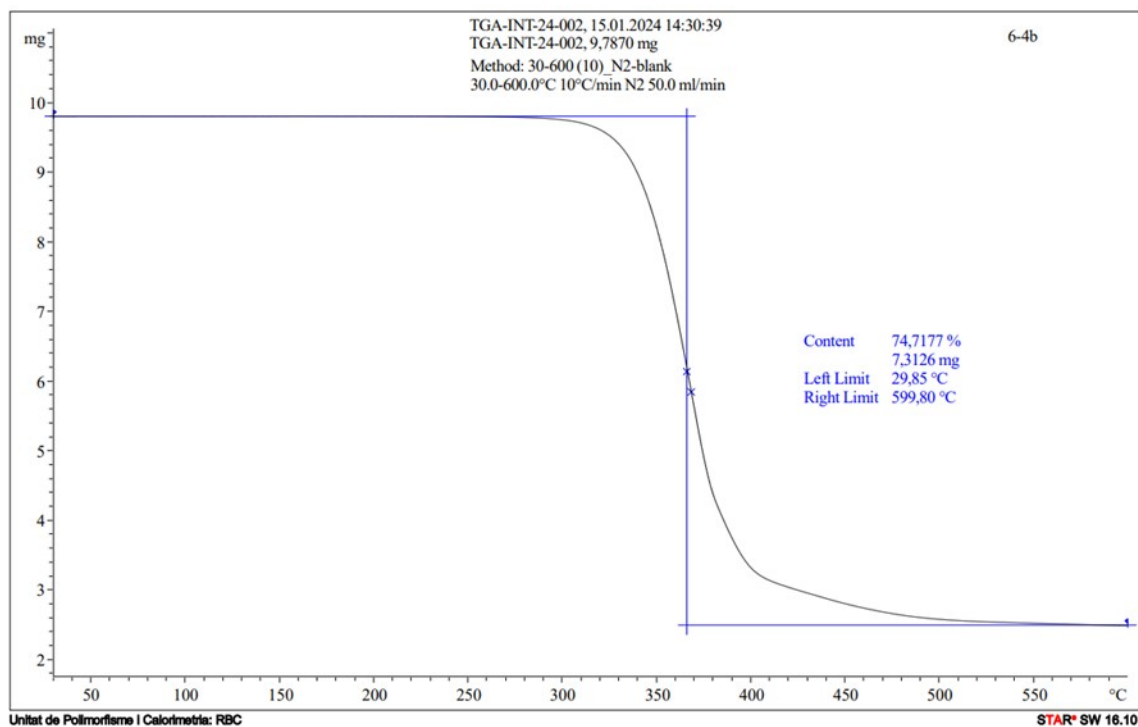

**Fig. S2.** Thermogravimetric curve of compounds **2-Eu** (top) and **6-Yb** (bottom).

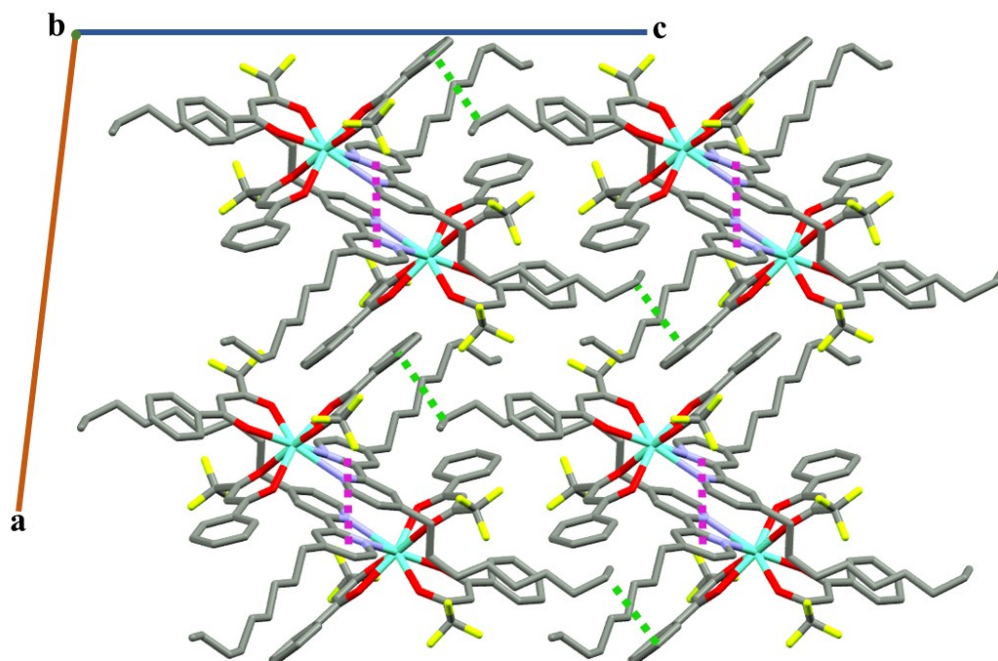

**Fig. S3** Crystal packing of compound **2-Eu**. No intermolecular interactions are considered. The shortest Cg-Cg distance is 3.938 Å from the pyridine ring constituted by N1, C31, C32, C33, C34, C35 atoms. The shortest H- $\pi$  interaction is 2.7 Å from the ring of one  $\beta$ -diketone molecule and one hydrogen from the alkyl chain. All in all, the distances of the intermolecular interactions are large enough to consider isolated mononuclear systems packed in the crystal lattice.

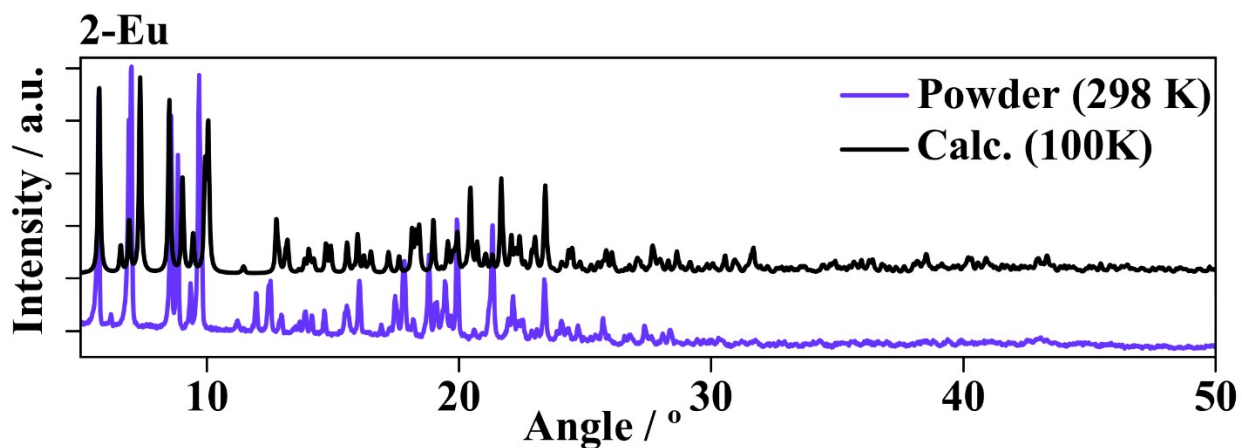

**Fig. S4** Powder X-Ray Diffraction pattern of the powder of sample **2-Eu** compared to the Pattern calculated from the Single Crystal structure. Powder X-Ray Diffraction is measured at room temperature (298 K) and the Single crystal structure is measured at 77 K.

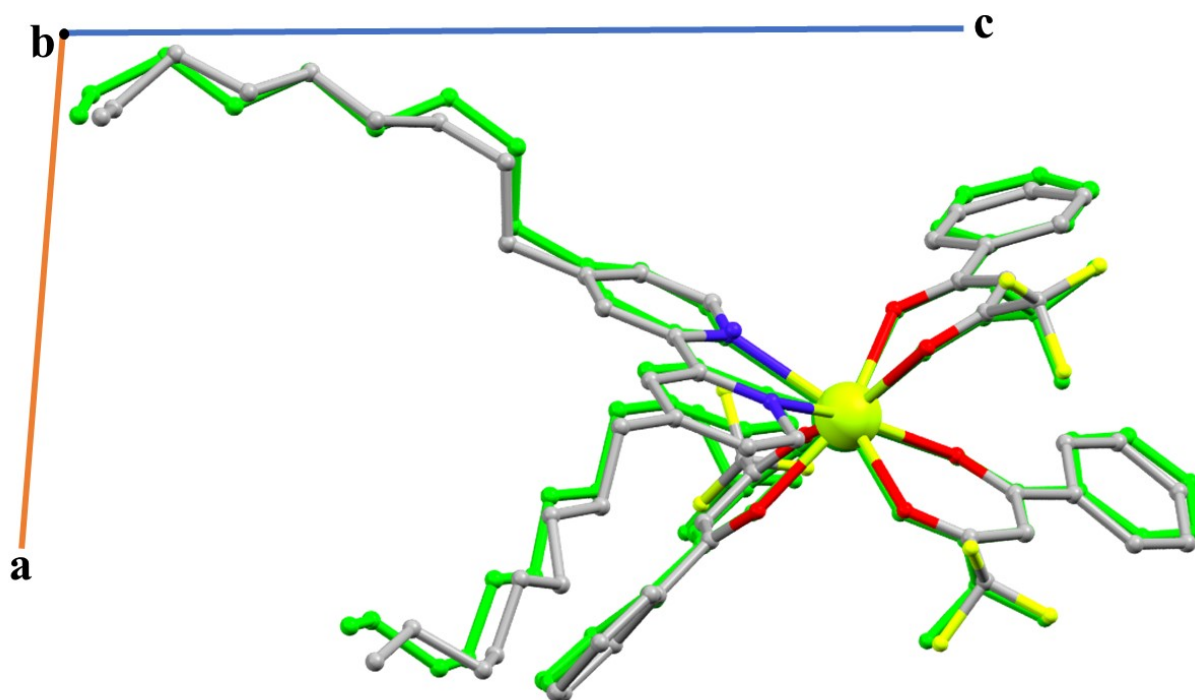

Fig.S5. Single crystal structure overlay of compound 1-Eu measured at 77K (green) and compound 3-Tb measured at 304 K (default colours).

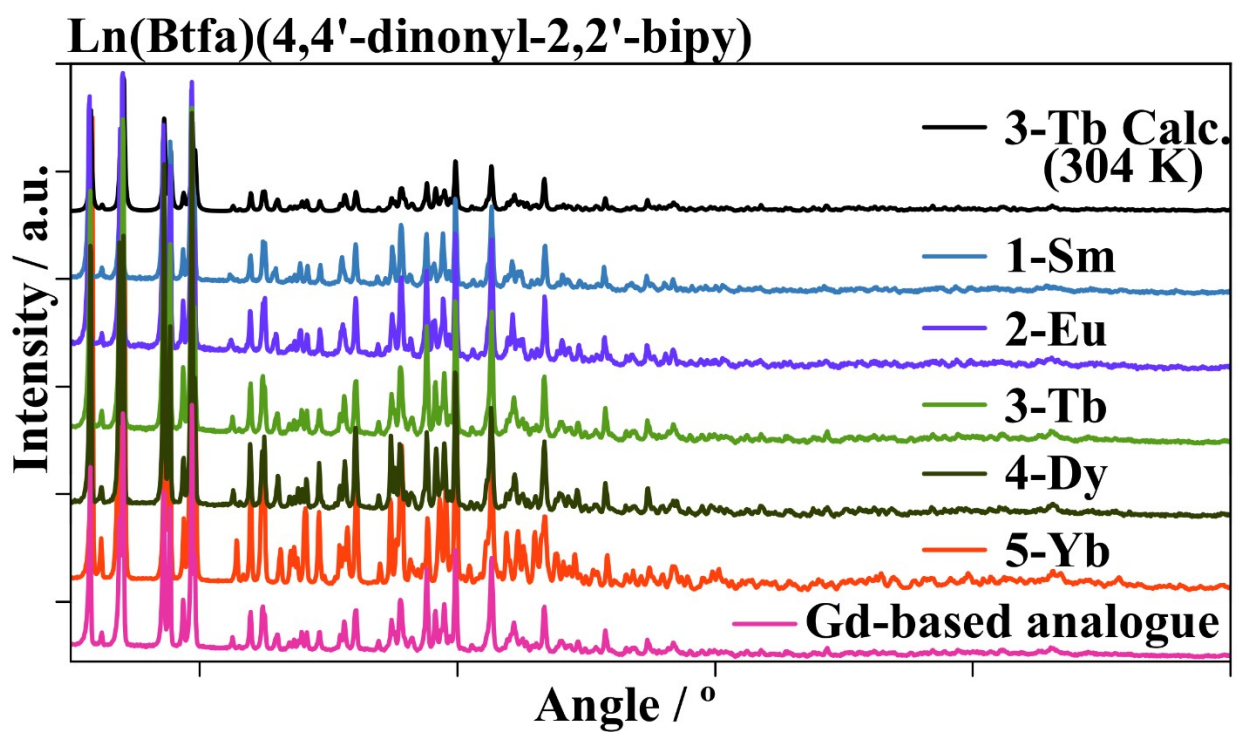

**Fig. S6.** Powder X-Ray Diffraction pattern of samples **1-Sm** to **5-Yb** and the Gadolinium isostructural analogue measured at room temperature (298K) compared to the pattern calculated from the Single Crystal structure measured at 304 K.

**Table S1.** Crystallographic information from the Single Crystal X-Ray Diffraction measurements of compounds **2-Eu**, **4-Dy** and **5-Yb**

| <b>Complex</b>                                                     | <b>2-Eu</b>               | <b>4-Dy</b>               | <b>6-Yb</b>               | <b>3-Tb</b>               |
|--------------------------------------------------------------------|---------------------------|---------------------------|---------------------------|---------------------------|
| <b>Formula</b>                                                     | $C_{58}H_{62}EuF_9N_2O_6$ | $C_{58}H_{62}DyF_9N_2O_6$ | $C_{58}H_{62}F_9N_2O_6Yb$ | $C_{58}H_{62}F_9N_2O_6Tb$ |
| <b>FW [g/mol]</b>                                                  | 1206.05                   | 1216.59                   | 1227.14                   | 1213.01                   |
| <b>Crystal System</b>                                              | triclinic                 | triclinic                 | triclinic                 | Triclinic                 |
| <b>Space Group</b>                                                 | P-1                       | P-1                       | P-1                       | P-1                       |
| <b>a [Å]</b>                                                       | 12.8601(5)                | 12.8613(12)               | 12.8760(8)                | 12.8570(6)                |
| <b>b [Å]</b>                                                       | 14.0622(7)                | 14.1376(14)               | 14.2205(9)                | 14.9805(7)                |
| <b>c [Å]</b>                                                       | 16.1521(7)                | 16.0565(15)               | 15.9478(10)               | 16.1248(8)                |
| <b><math>\alpha</math> [°]</b>                                     | 106.558(2)                | 106.879(4)                | 107.041(2)                | 107.762(2)                |
| <b><math>\beta</math> [°]</b>                                      | 94.495(2)                 | 94.113(4)                 | 93.862(2)                 | 93.451(2)                 |
| <b><math>\gamma</math> [°]</b>                                     | 94.606(2)                 | 94.906(4)                 | 94.880(2)                 | 93.871(2)                 |
| <b>V [Å<sup>3</sup>]</b>                                           | 2775.1(2)                 | 2769.2(5)                 | 2768.7(3)                 | 2940.2(2)                 |
| <b>Z</b>                                                           | 2                         | 2                         | 2                         | 2                         |
| <b>T[K]</b>                                                        | 100                       | 100                       | 100                       | 304(2)                    |
| <b><math>\lambda</math>(Mo <math>K\alpha</math>) [Å]</b>           | 0.71073                   | 0.71073                   | 0.71073                   | 0.71073                   |
| <b>D<sub>calc</sub> [g cm<sup>-3</sup>]</b>                        | 1.443                     | 1.459                     | 1.472                     | 1.370                     |
| <b><math>\mu</math>(Mo <math>K\alpha</math>) [mm<sup>-1</sup>]</b> | 1.211                     | 1.430                     | 1.770                     | 1.279                     |
| <b>R</b>                                                           | 0.0410                    | 0.0421                    | 0.0373                    | 0.0761                    |
| <b>wR<sub>2</sub></b>                                              | 0.0817                    | 0.1076                    | 0.0863                    | 0.2564                    |



**Table S2.** Selected bond distances (Å) for **2-Eu**, **4-Dy** and **6-Yb**.

|                         | <b>2-Eu</b> | <b>4-Dy</b> | <b>6-Yb</b> |
|-------------------------|-------------|-------------|-------------|
| <b>Ln-O1</b>            | 2.389(2)    | 2.333(3)    | 2.283(2)    |
| <b>Ln-O2</b>            | 2.362(2)    | 2.311(3)    | 2.268(19)   |
| <b>Ln-O3</b>            | 2.343(2)    | 2.320(3)    | 2.292(2)    |
| <b>Ln-O4</b>            | 2.351(2)    | 2.311(3)    | 2.270(18)   |
| <b>Ln-O5</b>            | 2.364(2)    | 2.320(3)    | 2.278(2)    |
| <b>Ln-O6</b>            | 2.353(2)    | 2.355(3)    | 2.315(19)   |
| <b>Ln-N1</b>            | 2.559(3)    | 2.527(3)    | 2.488(2)    |
| <b>Ln-N2</b>            | 2.575(3)    | 2.540(3)    | 2.489(2)    |
| <b>Shortest Ln---Ln</b> | 8.9668      | 8.921       | 8.920       |

## 1.1 Luminescence measurements:

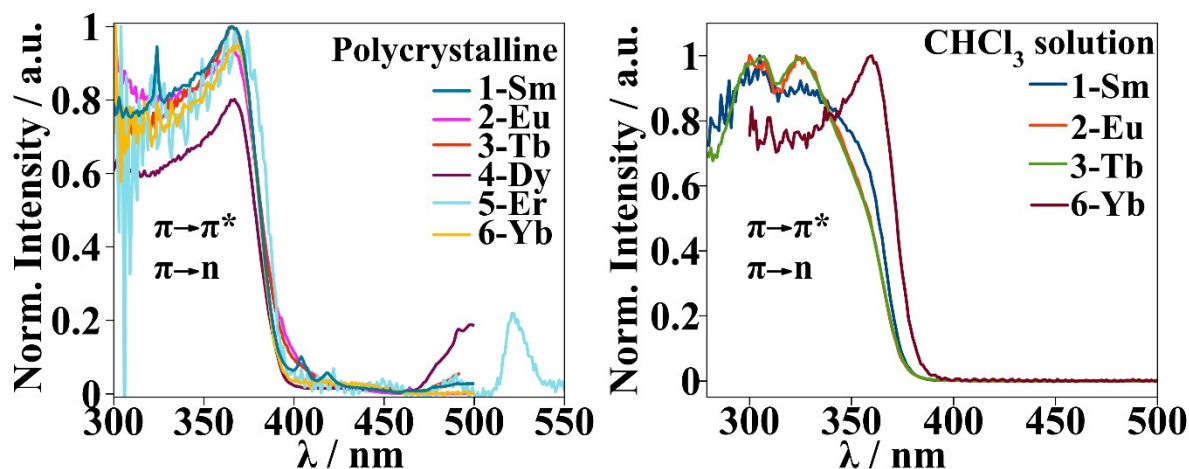

**Figure S7.** Excitation spectra of the polycrystalline samples (left) and  $\text{CHCl}_3$  solutions (right) of compounds **1-Sm** to **6-Yb** measured at the emission wavelength ( $\lambda_{\text{em}}$ ) of 650 nm ( $^4\text{G}_{5/2} \rightarrow ^6\text{H}_{9/2}$ ) for **1-Sm**, at 614 nm ( $^5\text{D}_0 \rightarrow ^7\text{F}_2$ ) for **2-Eu**, at 546 nm ( $^5\text{D}_4 \rightarrow ^7\text{F}_5$ ) for **3-Tb**, at 577 nm ( $^4\text{F}_{9/2} \rightarrow ^6\text{H}_{13/2}$ ) for **4-Dy**, at 1526 nm ( $^4\text{I}_{13/2} \rightarrow ^4\text{I}_{15/2}$ ) for **5-Er** and at 1027 nm ( $^5\text{F}_{5/2} \rightarrow ^2\text{F}_{7/2}$ ) for **6-Yb**. The peak appearing at 325 nm in the solid state excitation spectra of compound **1-Sm** corresponds to an harmonic signal of the lamp replica. Reliably excitation spectra could not be obtained for the  $10^{-6}$  M chloroform solutions containing compounds **4-Dy** and **5-Er** because of the poor luminescence properties that these complexes showed in solution. In the  $\text{CHCl}_3$  solutions spectra, **1-Sm**, **2-Eu** and **3-Tb** show similar profile with a broad band showing to peak maxima. This is very similar to the absorption spectra obtained for those compounds, meanwhile, compound **6-Yb** shows band with a solely peak appearing at longer wavelengths. This may indicate that while sensitization of compounds **1-Sm**, **2-Eu** and **3-Tb** take place through both ligands, Btfa and also 4,4'-dinonyl-2,2'-bipy (lower wavelength peak), sensitization of **6-Yb** takes place through only the Btfa ligand. Singlet state of the  $\beta$ -diketone is less energetic than the polypyridyl N,N-donor ligand as seen in the absorption measurements. Since the emitting level

of the  $\text{Yb}^{3+}$  ion is of lower energy, Btfa may play a more important role in **6-Yb** sensitization effect.

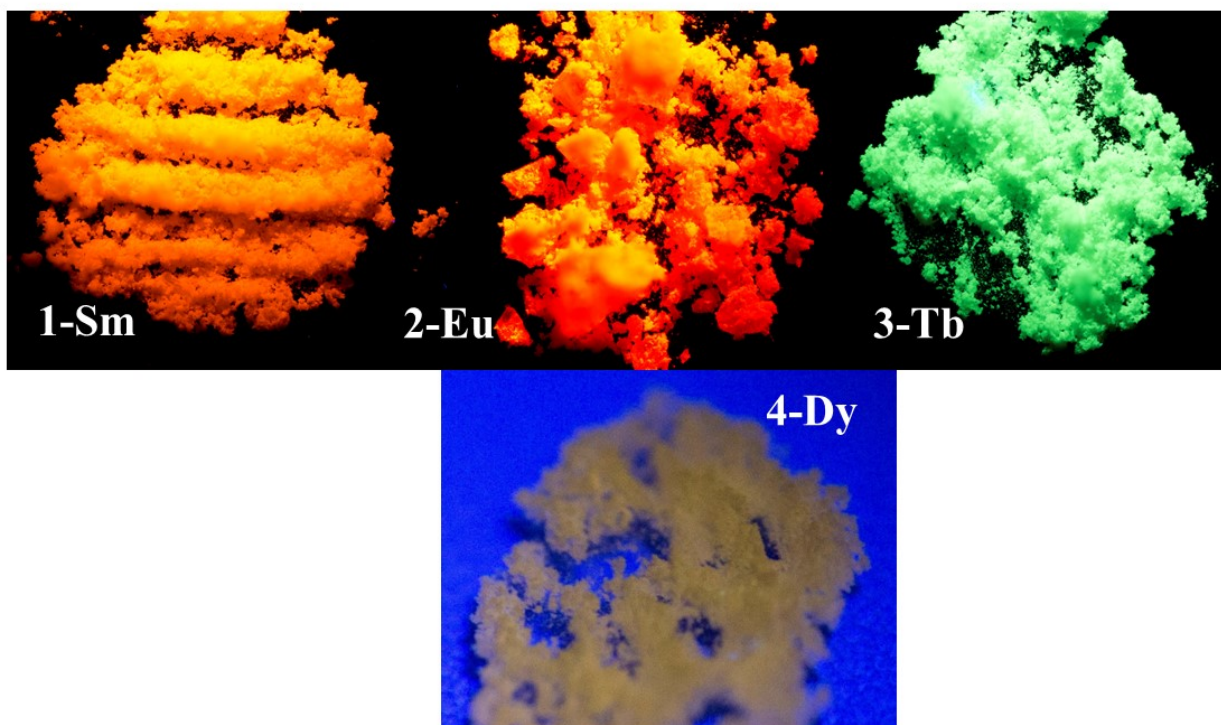

**Fig. S8.** a) Emission color observed by the naked eye of the polycrystalline samples of **1-Sm**, **2-Eu**, **3-Tb** and **4-Dy** in  $\text{CHCl}_3$  under the radiation of the laboratory UV lamp

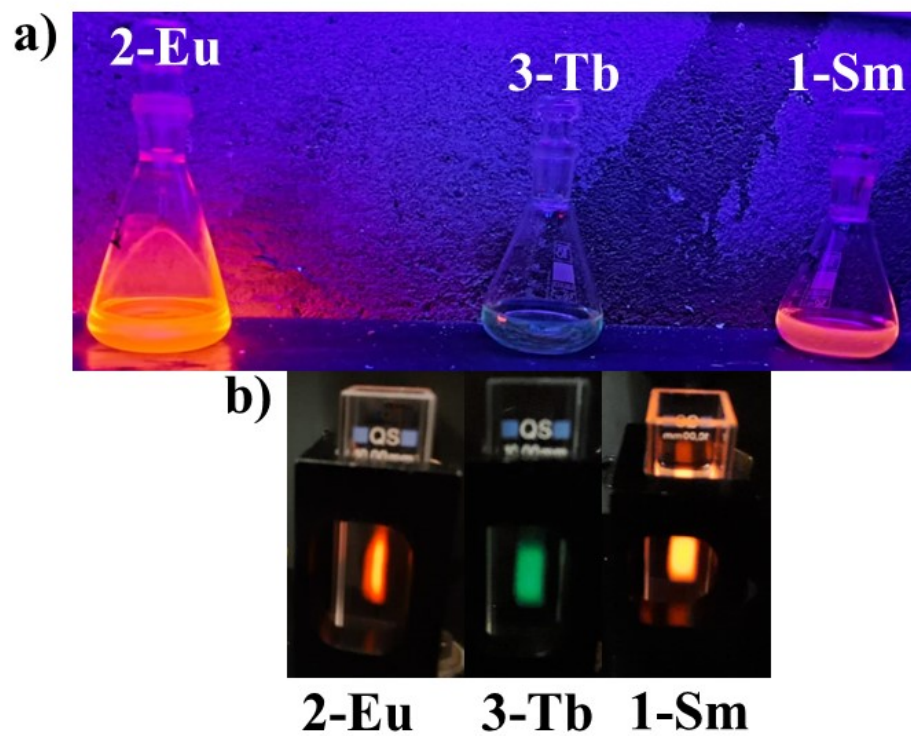

**Fig. S9.** a) Emission color observed by the naked eye of compounds **1-Sm**, **2-Eu** and **3-Tb** in  $\text{CHCl}_3$  solution under the radiation of the laboratory UV lamp. b) and under 321 nm radiation.

## CIE chromaticiy diagram 1931

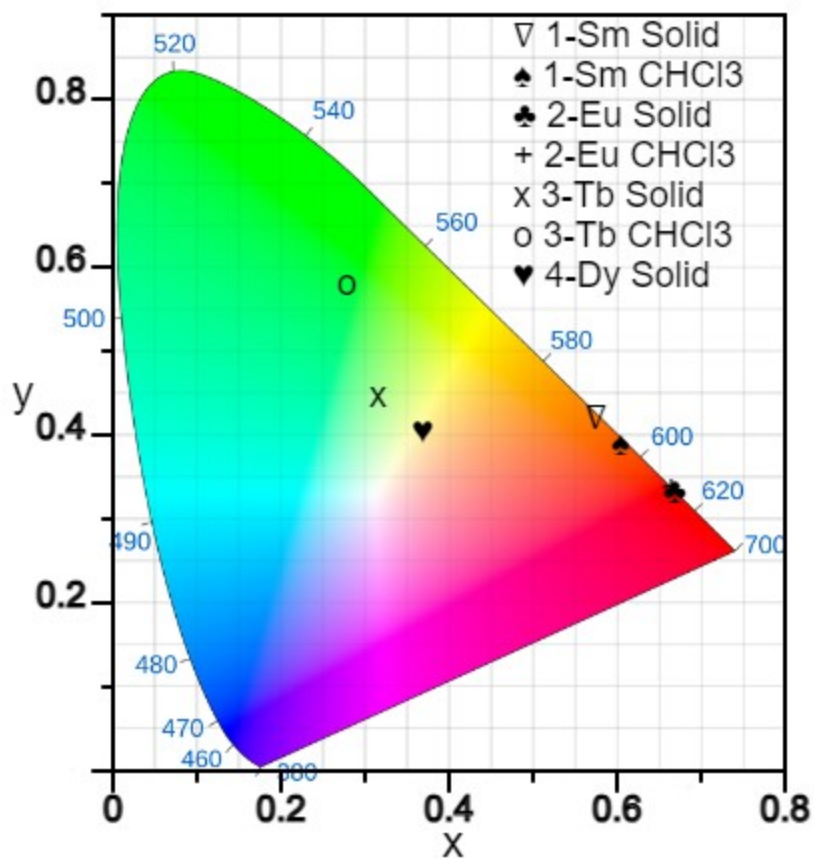

**Figure S10.** CIE chromaticiy diagram 1931 colour coordinates, calculated for all emission spectra recorded in solid and solution state.

**Table S3** a), b), c), d) and f). Wavelength assignation compilation to the emission transitions found in the emission spectra of the presented lanthanide coordination compounds.

| <b>1-Sm</b>                       |                        |                                                     |
|-----------------------------------|------------------------|-----------------------------------------------------|
|                                   | <b>Polycrystalline</b> | <b>1·10<sup>-6</sup>M CHCl<sub>3</sub> solution</b> |
| $^4G_{5/2} \rightarrow ^6H_{5/2}$ | 566 nm                 | 564 nm                                              |
| $^4G_{5/2} \rightarrow ^6H_{7/2}$ | 609 nm                 | 609 nm                                              |
| $^4G_{5/2} \rightarrow ^6H_{9/2}$ | 651 nm                 | 647 nm                                              |

| <b>2-Eu</b>                        |                        |                                                     |
|------------------------------------|------------------------|-----------------------------------------------------|
|                                    | <b>Polycrystalline</b> | <b>1·10<sup>-6</sup>M CHCl<sub>3</sub> solution</b> |
| $^5D_0 \rightarrow ^7F_0$          | 581 nm                 | 579 nm                                              |
| $^5D_0 \rightarrow ^7F_1$          | 592 nm                 | 591 nm                                              |
| $^5D_0 \rightarrow ^7F_2$          | 614 nm                 | 611 nm                                              |
| $^5D_0 \rightarrow ^7F_3$          | 653 nm                 | 651 nm                                              |
| $^5D_0 \rightarrow ^7F_4$          | 707 nm                 | 703 nm                                              |
| $^4G_{5/2} \rightarrow ^6H_{11/2}$ | 702 nm                 | 709 nm                                              |

| <b>3-Tb</b>                   |                        |                                                     |
|-------------------------------|------------------------|-----------------------------------------------------|
|                               | <b>Polycrystalline</b> | <b>1·10<sup>-6</sup>M CHCl<sub>3</sub> solution</b> |
| $^5D_4 \rightarrow ^7F_6$     | 492 nm                 | 489 nm                                              |
| $^5D_4 \rightarrow ^7F_5$     | 546 nm                 | 545 nm                                              |
| $^5D_4 \rightarrow ^7F_4$     | 583 nm                 | 582 nm                                              |
| $^5D_4 \rightarrow ^7F_3$     | 619 nm                 | 618 nm                                              |
| $^5D_4 \rightarrow ^7F_{2-1}$ | 658 and 681 nm         | 658 and 681 nm                                      |

| <b>4-Dy</b>                        |                        |                                                     |
|------------------------------------|------------------------|-----------------------------------------------------|
|                                    | <b>Polycrystalline</b> | <b>1·10<sup>-6</sup>M CHCl<sub>3</sub> solution</b> |
| $^7F_{9/2} \rightarrow ^6H_{15/2}$ | 481 nm                 | -                                                   |
| $^7F_{9/2} \rightarrow ^6H_{13/2}$ | 577 nm                 | -                                                   |
| $^7F_{9/2} \rightarrow ^6H_{11/2}$ | 664 nm                 | -                                                   |

| <b>5-Yb</b>                       |                        |                                                     |
|-----------------------------------|------------------------|-----------------------------------------------------|
|                                   | <b>Polycrystalline</b> | <b>1·10<sup>-6</sup>M CHCl<sub>3</sub> solution</b> |
| $^7F_{5/2} \rightarrow ^2F_{7/2}$ | 998 nm                 | 999 nm                                              |

| <b>6-Er</b>                         |                        |                                                     |
|-------------------------------------|------------------------|-----------------------------------------------------|
|                                     | <b>Polycrystalline</b> | <b>1·10<sup>-6</sup>M CHCl<sub>3</sub> solution</b> |
| $^4I_{13/2} \rightarrow ^4I_{15/2}$ | 1524 nm                | -                                                   |

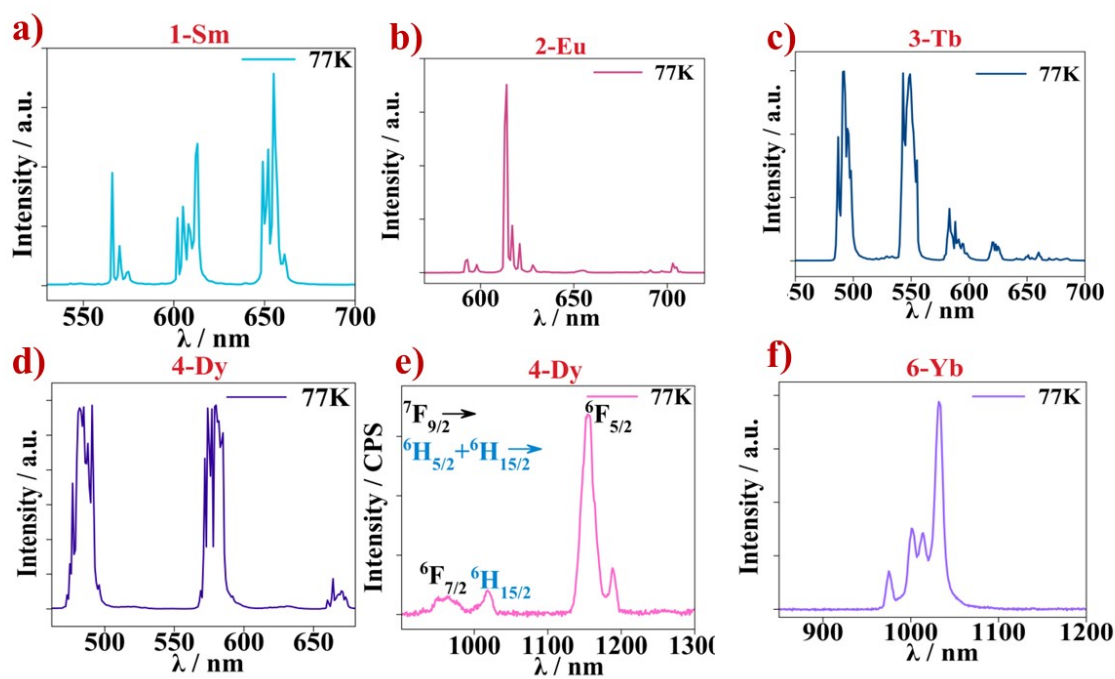

**Fig. S11.** Emission spectra measured at 77 K of the presented compounds **1-Sm** to **6-Yb** in the Visible a), b), c), d) and in the nIR range e) and f).

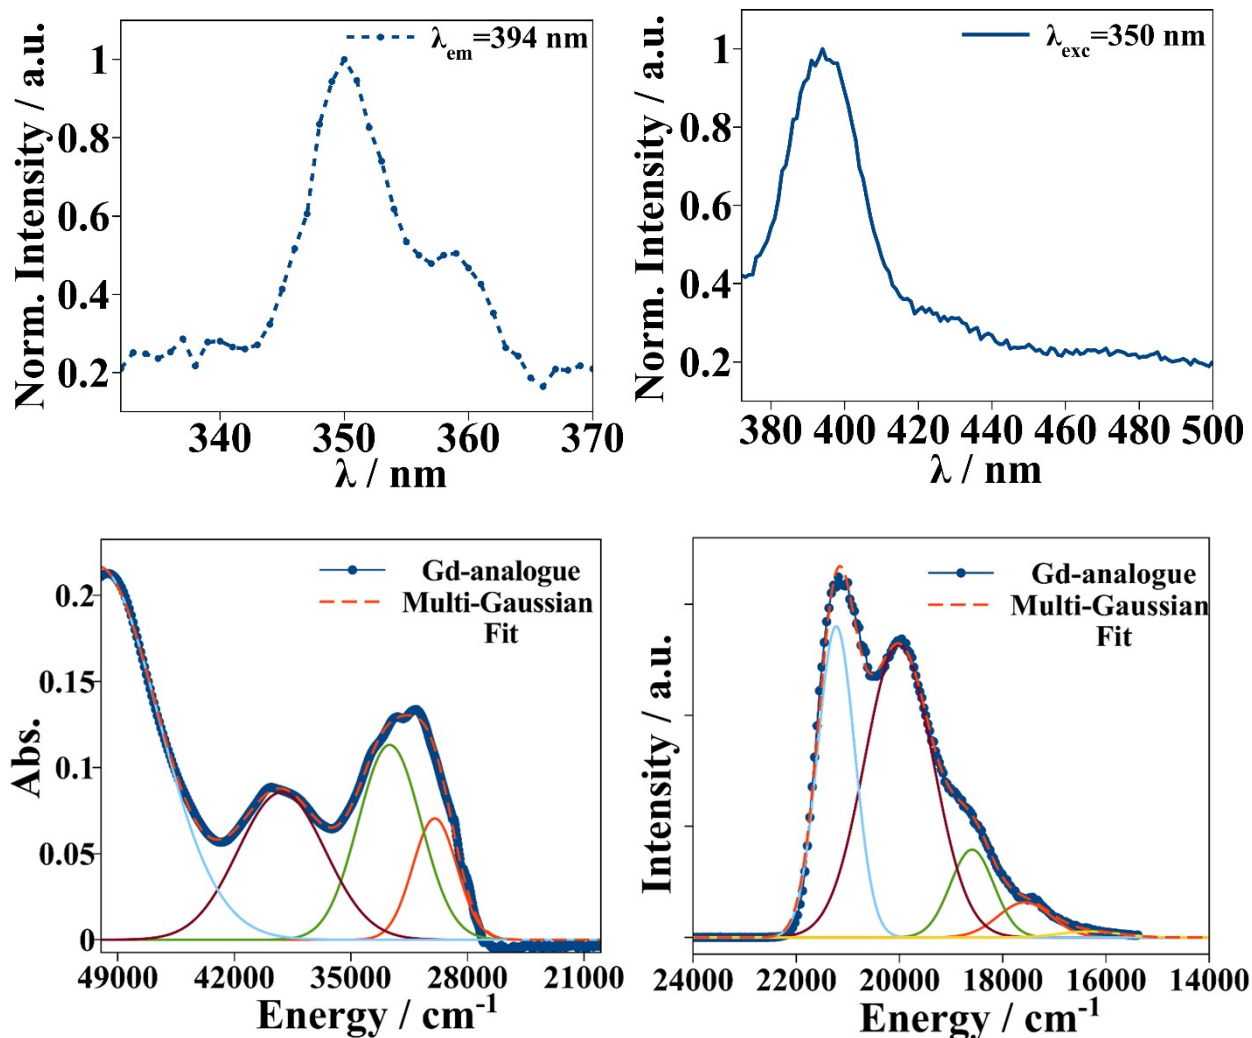

**Figure S12** *Top left*, excitation spectrum of 1mM CHCl<sub>3</sub> solution of [Gd(Btfa)<sub>3</sub>(4,4'-dinonyl-2,2'-bipy)] monitored at a  $\lambda_{em}$  of 394 nm. *Top right*, emission spectrum of 1mM CHCl<sub>3</sub> solution of [Gd(Btfa)<sub>3</sub>(4,4'-dinonyl-2,2'-bipy)] monitored at a  $\lambda_{exc}$  of 350 nm. Excitation and emission bands found in spectra of [Gd(Btfa)<sub>3</sub>(4,4'-dinonyl-2,2'-bipy)] are assigned to excitation and emission transitions from the ligand molecules. *Bottom left*, UV-Vis absorbance spectrum of compound [Gd(Btfa)<sub>3</sub>(4,4'-dinonyl-2,2'-bipy)] measured on a 1mM CHCl<sub>3</sub> solution. Singlet state ( $S_1$ ) is extracted from the edge of the Gaussian function from the multi-gaussian fit of the absorbance spectrum. *Bottom*, phosphorescence spectrum of 1mM CHCl<sub>3</sub> solution containing [Gd(Btfa)<sub>3</sub>(4,4'-dinonyl-2,2'-bipy)] ( $\lambda_{exc}$ =336 nm). The band, corresponding to the ligands phosphorescence, was fitted with a multi-gaussian fit. Lowest triplet state ( $T_1$ ) is obtained from the barycentre of the gaussian function found in the highest energy range.



### 1.3. Photoluminescence quantum yield ( $\phi_{Ln}^L$ ) and luminescence decay time ( $\tau_{obs}$ ):

The amount of energy absorbed by the chromophore ligands that is transferred to the excited state of the lanthanide ion is known as the sensitization efficiency ( $\eta_{sens}$ ), and it plays a significant role in the overall quantum yield, which is defined as:  $\phi_{Ln}^L = \eta_{sens} \cdot \phi_{Ln}^{Ln}$

The other factor that determines the  $\phi_{Ln}^L$  value is the intrinsic quantum yield ( $\phi_{Ln}^{Ln}$ ) that alludes to the quantum yield once the emitting level of the lanthanide ion has been populated. The intrinsic quantum yield is related to the ratio between the measured time decay and the radiative lifetime  $\tau_{rad}$  as shown in Eq. S1

$$\phi_{Ln}^{Ln} = \frac{k_r}{k_r + k_{nr}} = \frac{\tau_{obs}}{\tau_{rad}} \quad \text{Eq. S1}$$

The radiative lifetime ( $\tau_{rad}$ ) is the luminescence lifetime in absence of non-radiative deactivations. Because of the pure magnetic dipole character that europium(III)'s  $^5D_0 \rightarrow ^7F_1$  transition,  $\tau_{rad}$  from the  $^5D_0$  emissive level can be calculated from the corrected emission spectrum and a simplified equation presented in Eq. S2 [1]:

$$\frac{1}{\tau_{rad}} = A_{MD,0} \times n^3 \left( \frac{I_{TOT}}{I_{MD}} \right) \quad \text{Eq. S2}$$

$A_{MD,0}$  is a constant ( $14.65 \text{ cm}^{-1}$ ),  $n$  is the refractive index (1.517 for microcrystalline sample and 1.446 for chloroform solution, 20°C) and  $\frac{I_{TOT}}{I_{MD}}$  is the ratio between the total integrated area measured from the corrected Eu(III) emission spectrum ( $I_{TOT}$ ) to the integrated area of the pure magnetic dipole transition  $^5D_0 \rightarrow ^7F_1$  ( $I_{MD}$ ).

#### 1.4 Organic light-emitting diodes

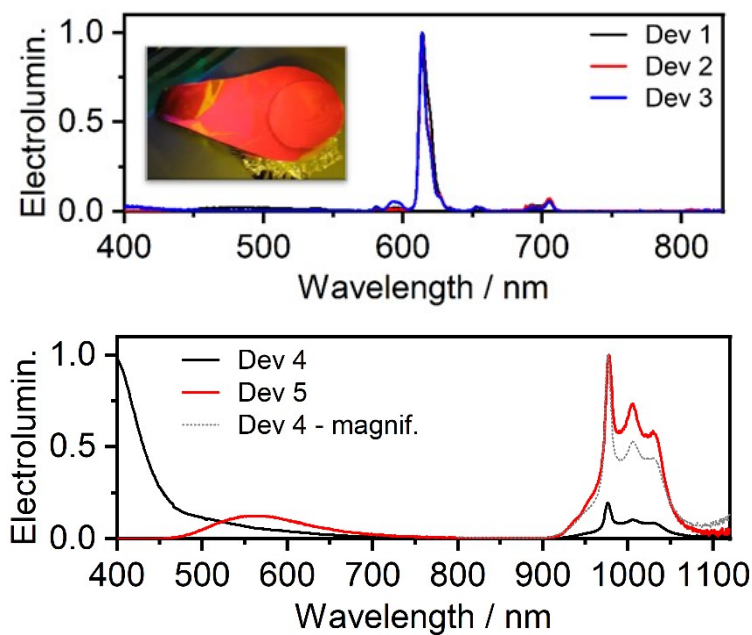

**Fig. S13.** Electroluminescence spectra of devices **1-5** from compounds **1-Eu** (Top) and **6-Yb** (Bottom). Inset top, photoluminescence from a film of **1-Eu** thermally deposited on aluminum foil ( $\lambda_{\text{exc}}=365$  nm).

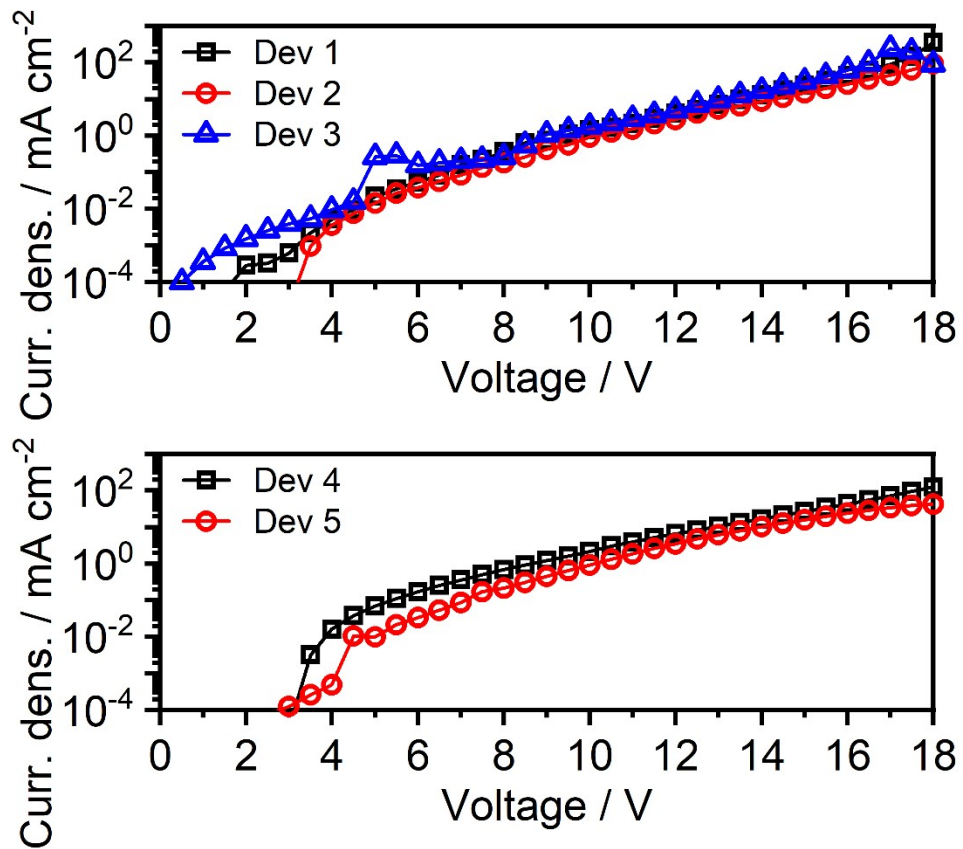

Fig. S14. Current Density vs. Voltage bias for devices 1-5.

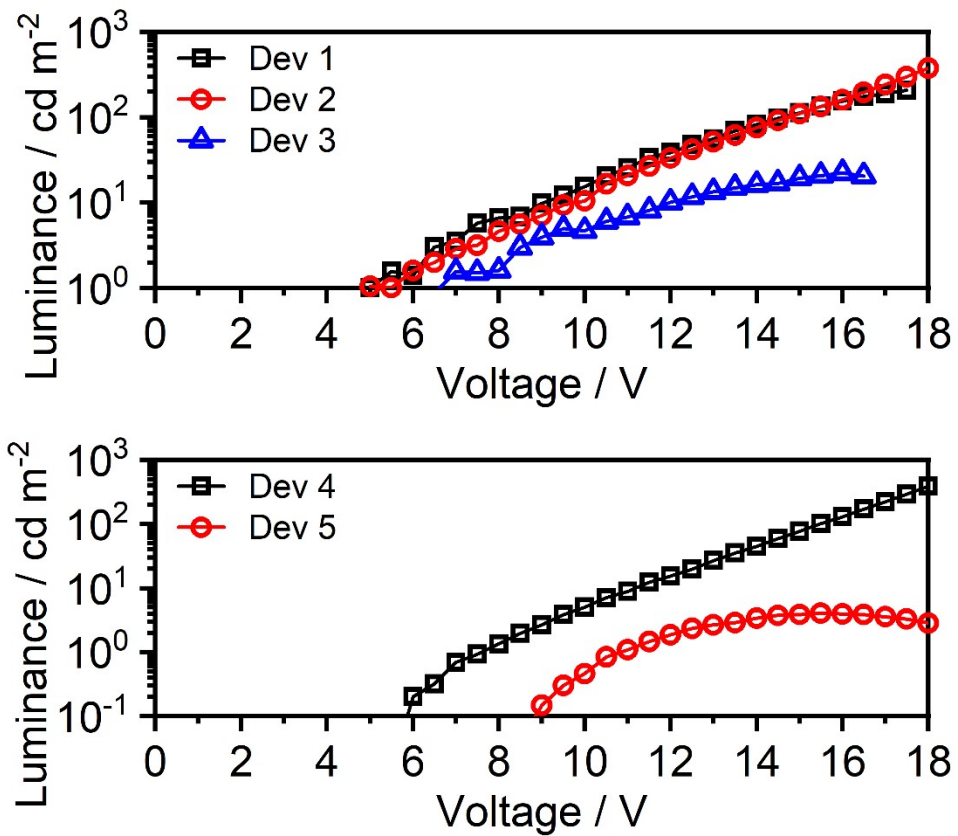

Fig. S15. Luminance vs. Voltage bias for devices 1-5.

## 1.2 Magnetic measurements:

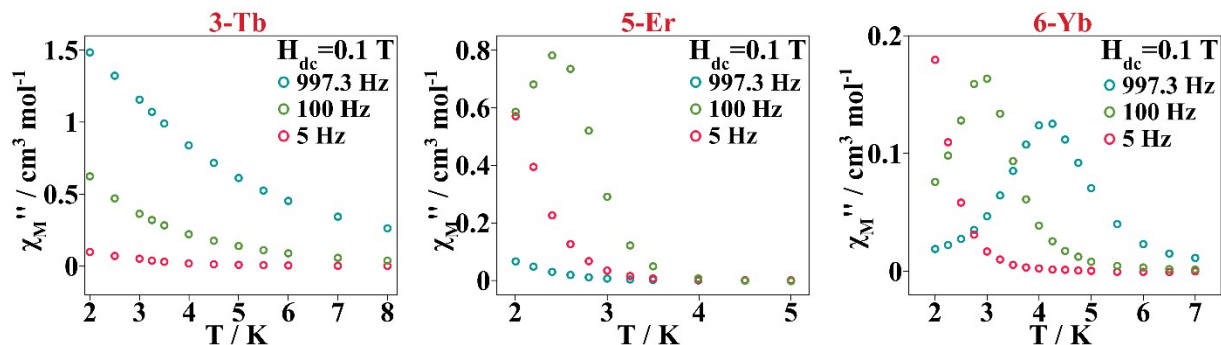

**Fig. S16.**  $\chi_M''$  component in front of the temperature measured at three frequencies of the  $4 \cdot 10^{-4}$  T oscillating magnetic field and an external magnetic dc field of 0.1 T for compounds **3-Tb**, **5-Er** and **6-Yb**. The  $\chi_M''$  shows dependence with temperature and frequency for the three compounds.

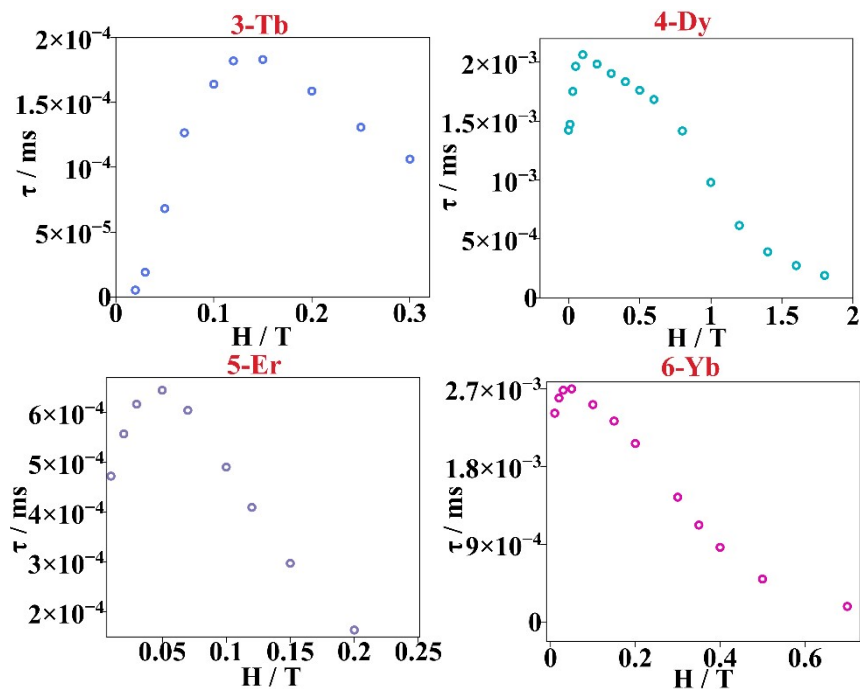

**Fig. S17** Relaxation times ( $1/2\pi\nu$ ) in front of different static magnetic fields measured at a constant temperature of 2 K for **3-Tb** and **5-Er**, 11 K for **4-Dy** and 2.75 K for **6-Yb** under an ac magnetic field of  $4 \cdot 10^{-4}$  T oscillating between 1 to 1488 Hz.

$$\chi_{AC}(\omega) = \chi_S + \frac{\chi_T - \chi_S}{1 + (i\omega\tau)^{(1-\alpha)}}$$

**Eq. S3.** Generalized Debye model that describes a system with a distribution of the magnetization relaxation time. Where  $\chi_S$  and  $\chi_T$  are the adiabatic and thermal susceptibilities,  $\tau$  is the relaxation of the magnetization time and  $\omega$  is the angular frequency of the ac field ( $\omega = 1/2\pi f$ ).  $\chi_T$  is the susceptibility in the limit of the lowest field frequencies where the thermal equilibrium of the system is observed.  $\chi_S$  (lower than the  $\chi_T$ ) is observed when the oscillations of the ac field are fast compared to the time constant,  $\tau$ , and the magnetic system remains isolated from its environment. The  $\alpha$  parameter quantifies the width of the  $\tau$  distribution and it ranges from 0 to 1. The wider the time distribution,  $\alpha$  acquires a larger value.

| T/K  | $\chi_S/ \text{cm}^3\text{mol}^{-1}$ | $\chi_T/ \text{cm}^3\text{mol}^{-1}$ | $\tau / \text{s}$ | $\alpha$  |
|------|--------------------------------------|--------------------------------------|-------------------|-----------|
| 2.5  | 0.0899994                            | 5.6966808                            | 0.0239962         | 0.243565  |
| 3    | 0.0808478                            | 4.784409                             | 0.0237388         | 0.2470289 |
| 3.5  | 0.0688829                            | 4.1410772                            | 0.0235062         | 0.2499711 |
| 4    | 0.0634415                            | 3.6401817                            | 0.0229922         | 0.2475158 |
| 4.5  | 0.0593894                            | 3.2141338                            | 0.0219038         | 0.2405165 |
| 5    | 0.0583447                            | 2.8899059                            | 0.0205298         | 0.2277201 |
| 5.5  | 0.0583902                            | 2.6156656                            | 0.0185999         | 0.2092533 |
| 6    | 0.0582438                            | 2.3773577                            | 0.0162939         | 0.1864077 |
| 6.5  | 0.0578338                            | 2.1799846                            | 0.0138781         | 0.1604597 |
| 7    | 0.0556806                            | 2.0071623                            | 0.0115571         | 0.1371048 |
| 7.5  | 0.0523509                            | 1.8620869                            | 0.0094869         | 0.1166131 |
| 8    | 0.0491802                            | 1.7375743                            | 0.0076983         | 0.0985174 |
| 8.5  | 0.045822                             | 1.6297371                            | 0.006171          | 0.0837034 |
| 9    | 0.0424934                            | 1.5352533                            | 0.0048814         | 0.0714849 |
| 9.5  | 0.0392212                            | 1.4517602                            | 0.00379           | 0.0617365 |
| 10   | 0.0367583                            | 1.3774303                            | 0.0028693         | 0.0540821 |
| 10.4 | 0.0345922                            | 1.3102725                            | 0.0020924         | 0.0484347 |
| 10.9 | 0.0326136                            | 1.2451281                            | 0.001419          | 0.0447284 |
| 11.3 | 0.0323025                            | 1.1870709                            | 9.22E-04          | 0.0418099 |
| 12   | 0.0365019                            | 1.1081857                            | 4.43E-04          | 0.0383483 |
| 12.5 | 0.0444623                            | 1.062124                             | 2.70E-04          | 0.0343113 |
| 13   | 0.0562949                            | 1.0197036                            | 1.64E-04          | 0.029758  |
| 13.5 | 0.0735509                            | 0.9807693                            | 1.00E-04          | 0.0279038 |

**Table S4.** Values of the parameters obtained from the fit using the Generalized Debye model function for compound **4-Dy** from the ac magnetic measurements at different temperatures at a 0 external magnetic field.

| T/K  | $\chi_S/ \text{cm}^3\text{mol}^{-1}$ | $\chi_T/ \text{cm}^3\text{mol}^{-1}$ | $\tau / \text{s}$ | $\alpha$    |
|------|--------------------------------------|--------------------------------------|-------------------|-------------|
| 5    | 0.025755273                          | 2.894972045                          | 0.434302279       | 0.049943799 |
| 5.5  | 0.025183443                          | 2.523949348                          | 0.21968462        | 0.035531107 |
| 6    | 0.02440133                           | 2.295606999                          | 0.125936886       | 0.028754592 |
| 6.5  | 0.024135394                          | 2.112338                             | 0.076794128       | 0.023851869 |
| 7    | 0.022032696                          | 1.959084046                          | 0.048900038       | 0.021727093 |
| 7.5  | 0.02175058                           | 1.828746726                          | 0.032463862       | 0.019858225 |
| 8    | 0.021403515                          | 1.715719499                          | 0.022162438       | 0.018695676 |
| 8.5  | 0.019455247                          | 1.616759621                          | 0.015377077       | 0.019421731 |
| 9    | 0.01933141                           | 1.528721829                          | 0.010758944       | 0.020262677 |
| 9.5  | 0.01968522                           | 1.449606371                          | 0.007499486       | 0.021812518 |
| 10   | 0.020250793                          | 1.378695329                          | 0.00513716        | 0.025037769 |
| 10.4 | 0.020763265                          | 1.313902582                          | 0.003395967       | 0.030618168 |
| 10.9 | 0.021949555                          | 1.250758666                          | 0.002072573       | 0.036163797 |
| 11.3 | 0.023388448                          | 1.195209002                          | 0.001219484       | 0.04334925  |
| 12   | 0.028489691                          | 1.114714156                          | 5.07E-04          | 0.047359711 |
| 12.5 | 0.029950994                          | 1.068339329                          | 2.84E-04          | 0.049900342 |
| 13   | 0.029937286                          | 1.02565476                           | 1.61E-04          | 0.051643359 |
| 13.5 | 0.029842153                          | 0.986216068                          | 9.20E-05          | 0.053771433 |

**Table S5.** Values of the parameters obtained from the fit using the Generalized Debye model function for compound **4-Dy** from the ac magnetic measurements at different temperatures at direct current external magnetic field of 0.1 T.

| T/K | $\chi_S/\text{cm}^3\text{mol}^{-1}$ | $\chi_T/\text{cm}^3\text{mol}^{-1}$ | $\tau /s$ | $\alpha$ |
|-----|-------------------------------------|-------------------------------------|-----------|----------|
| 1.8 | 0.12152                             | 5.17077                             | 0.00018   | 0.27268  |
| 1.9 | 0.06319                             | 4.98984                             | 0.00016   | 0.27918  |
| 2   | 0.00583                             | 4.77019                             | 0.00015   | 0.28254  |
| 2.1 | 0.0012                              | 4.5873                              | 0.00014   | 0.27814  |
| 2.3 | 0.01233                             | 4.33987                             | 0.00013   | 0.26656  |
| 2.5 | 0.0372                              | 4.09429                             | 0.00012   | 0.2546   |
| 2.7 | 0.05996                             | 3.86918                             | 0.00011   | 0.24367  |
| 2.9 | 0.07411                             | 3.66271                             | 0.00011   | 0.23508  |
| 3.1 | 0.07206                             | 3.47414                             | 9.9E-05   | 0.23014  |
| 3.4 | 0.0723                              | 3.22011                             | 8.9E-05   | 0.22363  |
| 3.7 | 0.07027                             | 2.99735                             | 8.1E-05   | 0.22001  |

**Table S6.** Values of the parameters obtained from the fit using the Generalized Debye model function for compound **3-Tb** from the ac magnetic measurements at different temperatures at direct current external magnetic field of 0.1 T.

| T/K     | $\chi_S/\text{cm}^3\text{mol}^{-1}$ | $\chi_T/\text{cm}^3\text{mol}^{-1}$ | $\tau /s$ | $\alpha$ |
|---------|-------------------------------------|-------------------------------------|-----------|----------|
| 1.82727 | 0.40426                             | 2.67227                             | 0.00092   | 0.08266  |
| 1.88597 | 0.39162                             | 2.56991                             | 0.00077   | 0.08058  |
| 1.99649 | 0.3812                              | 2.44627                             | 0.0006    | 0.07118  |
| 2.09694 | 0.37131                             | 2.33912                             | 0.00047   | 0.06235  |
| 2.20135 | 0.36627                             | 2.2753                              | 0.0004    | 0.05557  |
| 2.3008  | 0.35014                             | 2.17278                             | 0.00029   | 0.04853  |
| 2.4019  | 0.33859                             | 2.09102                             | 0.00022   | 0.04082  |
| 2.50126 | 0.32079                             | 2.01706                             | 0.00016   | 0.0368   |
| 2.60047 | 0.29962                             | 1.94926                             | 0.00012   | 0.03266  |
| 2.70054 | 0.27142                             | 1.88614                             | 8.7E-05   | 0.02975  |

**Table S7.** Values of the parameters obtained from the fit using the Generalized Debye model function for compound **5-Er** from the ac magnetic measurements at different temperatures at direct current external magnetic field of 0.07 T.



| T/K | $\chi_S/\text{cm}^3\text{mol}^{-1}$ | $\chi_T/\text{cm}^3\text{mol}^{-1}$ | $\tau$ /s | $\alpha$ |
|-----|-------------------------------------|-------------------------------------|-----------|----------|
| 2.1 | 0.03552                             | 0.55693                             | 0.01185   | 0.15778  |
| 2.3 | 0.03235                             | 0.50111                             | 0.00737   | 0.123    |
| 2.5 | 0.03041                             | 0.45015                             | 0.00445   | 0.08537  |
| 2.7 | 0.02808                             | 0.41547                             | 0.00282   | 0.06772  |
| 2.9 | 0.0245                              | 0.38542                             | 0.0018    | 0.05532  |
| 3.1 | 0.02194                             | 0.36068                             | 0.00119   | 0.04713  |
| 3.4 | 0.01799                             | 0.32976                             | 6.58E-04  | 0.03771  |
| 3.7 | 0.01439                             | 0.30297                             | 3.81E-04  | 0.03035  |
| 4   | 0.01228                             | 0.28052                             | 2.30E-04  | 0.02112  |
| 4.3 | 0.00555                             | 0.26081                             | 1.43E-04  | 0.02068  |

**Table S8.** Values of the parameters obtained from the fit using the Generalized Debye model function for compound **6-Yb** from the ac magnetic measurements at different temperatures at direct current external magnetic field of 0.1 T.

**Table S9.** Compilation of the fitted parameters from the relaxation of the magnetization mechanisms of compounds **3-Tb**, **4-Dy**, **5-Er** and **6-Yb**.

|             | $H_{dc}$<br>(T) | Orbach                             |                      | QTM                 | Raman                               |      | Direct                              |
|-------------|-----------------|------------------------------------|----------------------|---------------------|-------------------------------------|------|-------------------------------------|
|             |                 | $\Delta E$<br>( $\text{cm}^{-1}$ ) | $\tau_0$<br>(s)      | $\tau_{QTM}$<br>(s) | $C$<br>$\text{s}^{-1}\text{K}^{-n}$ | $n$  | $A$<br>$\text{s}^{-1}\text{K}^{-1}$ |
| <b>3-Tb</b> | 0.1             |                                    |                      |                     | 0.93                                | 5.2  | 3275.14                             |
| <b>4-Dy</b> | 0               | 103.7                              | $2.53 \cdot 10^{-9}$ | 0.03                | $8.18 \cdot 10^{-4}$                | 5.5  |                                     |
|             | 0.1             | 140.5                              | $3.6 \cdot 10^{-11}$ |                     | $1.10 \cdot 10^{-4}$                | 6.2  |                                     |
| <b>5-Er</b> | 0.05            | 24.64                              | $8.75 \cdot 10^{-8}$ |                     | 96.1                                | 4.05 |                                     |
| <b>6-Yb</b> | 0.05            |                                    |                      |                     | 0.51                                | 6.5  | 8.58                                |

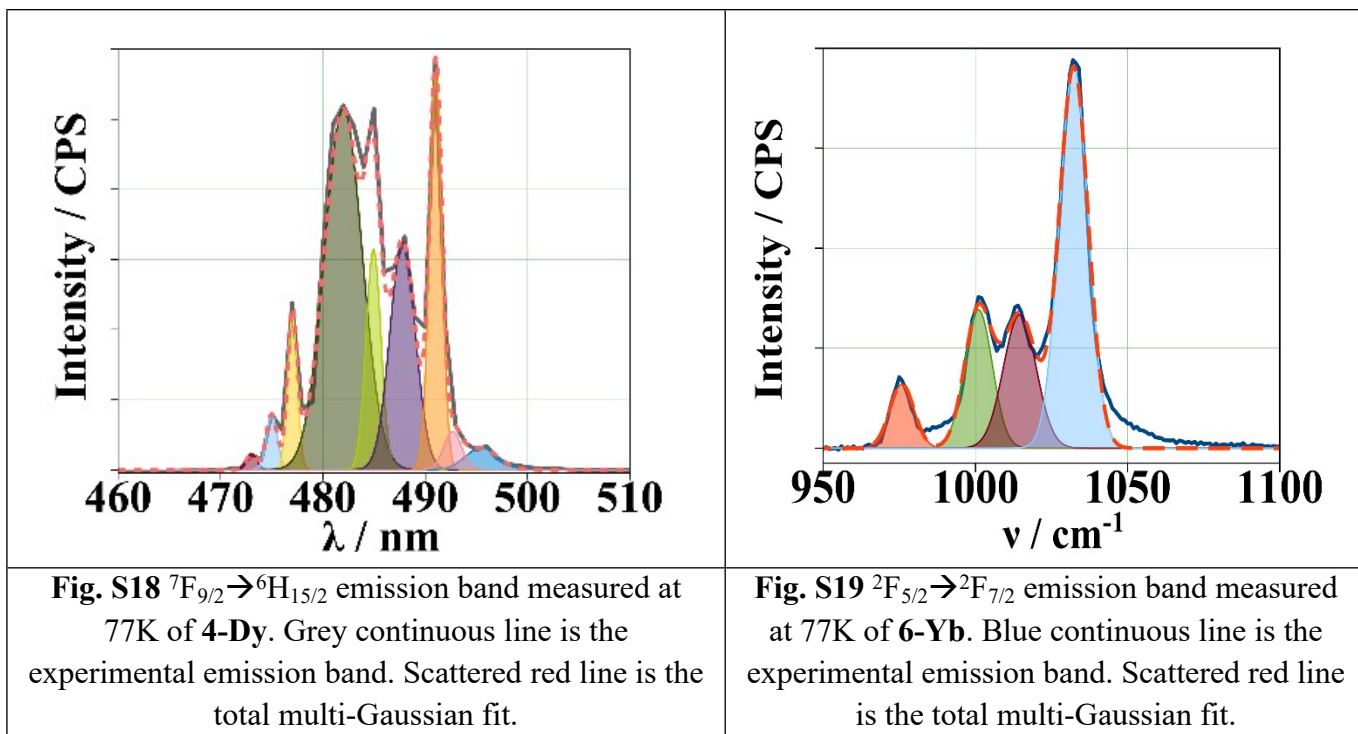

### 1.5. References:

- [1] M. H. V. Werts, R. T. F. Jukes, J. W. Verhoeven, *Phys. Chem. Chem. Phys.*, **2002**, 4, 1542.
